# Supplementary material for: How being perceived to be an artist boosts feelings of attraction in others
Source: Springer Nature journal article supplement (doi:10.1038/s41598-023-45952-0), 2023-10-31
Supplement: MOESM1 [file 41598_2023_45952_MOESM1_ESM.pdf]

# Supplementary Information

for the manuscript

“How being perceived to be an artist boosts feelings of attraction in others”

by

Eugen Wassiliwizky, Paul Wontorra, and Fredrik Ullén

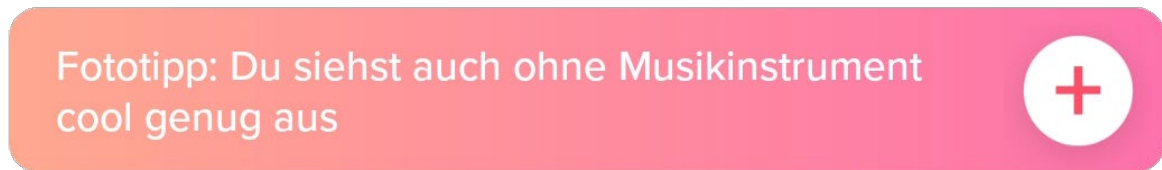

**Figure S1.** Screen shot from the dating platform *Tinder*. The German text reads: *Photo advice: You look cool enough without a musical instrument.*

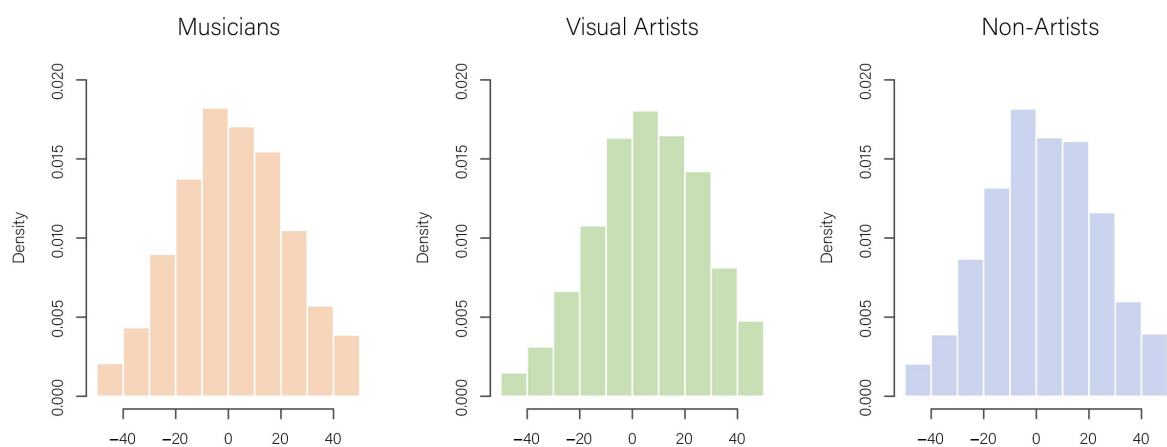

**Figure S2.** Density plots from the actual sample for facial attractiveness ratings of musicians, visual artists, and non-artists. Note that the collected data are (normally) distributed across the entire spectrum of the scale range, and that there is no systematic difference in attractiveness ratings between the three status groups. This is also reflected in statistical modeling (Model-A, Table S3), as Status per se does not predict Attractiveness ratings.

**Table S1.** General Observations I: Results for LMMs predicting ViewingTime (of faces and torsos) through mean facial attractiveness. The following model has been fitted:

$$\text{Level 1: ViewingTime}_{ij} = \beta_{0j} + \beta_{i0} + \beta_{1j} \text{MeanFacialAttractiveness} + \varepsilon_{ij}$$

| <i>Predictors</i>                                       | <i>Faces</i>                          |                                         |               | <i>Torsos</i>                         |                                         |               |
|---------------------------------------------------------|---------------------------------------|-----------------------------------------|---------------|---------------------------------------|-----------------------------------------|---------------|
|                                                         | <i>Estimates</i><br><i>[95%-CI]</i>   | <i>t</i>                                | <i>p</i>      | <i>Estimates</i><br><i>[95%-CI]</i>   | <i>t</i>                                | <i>p</i>      |
| <b>Fixed Effects</b>                                    |                                       |                                         |               |                                       |                                         |               |
| (Intercept)                                             | 9.865<br>[9.782, 9.949]               | 232.138                                 | <0.001        | 9.967<br>[9.877, 10.056]              | 219.035                                 | <0.001        |
| MeanFA                                                  | <b>0.001</b><br><b>[0.001, 0.002]</b> | <b>2.657</b>                            | <b>0.0085</b> | <b>0.001</b><br><b>[0.000, 0.002]</b> | <b>2.164</b>                            | <b>0.0317</b> |
| <b>Random Part</b>                                      |                                       |                                         |               |                                       |                                         |               |
| $\sigma^2$                                              |                                       | 0.263                                   |               |                                       | 0.275                                   |               |
| $\tau_0^2$                                              |                                       | 0.002 <sub>Stim</sub>                   |               |                                       | 0.006                                   |               |
| $\tau_0^2$                                              |                                       | 0.142 <sub>Sub</sub>                    |               |                                       | 0.162                                   |               |
| ICC                                                     |                                       | 0.353                                   |               |                                       | 0.379                                   |               |
| N                                                       |                                       | 190 <sub>Stim</sub> / 80 <sub>Sub</sub> |               |                                       | 190 <sub>Stim</sub> / 80 <sub>Sub</sub> |               |
| Observations                                            |                                       | 15200                                   |               |                                       | 15200                                   |               |
| Conditional R <sup>2</sup> /<br>Marginal R <sup>2</sup> |                                       | 0.354 / 0.0004                          |               |                                       | 0.379 / 0.001                           |               |

**Table S2.** General Observations II: LMM results predicting Ratings of each scale through the portrait's Layout format. The following model has been fitted:

$$\text{Level 1: Rating}_{ij} = \beta_{0j} + \beta_{10} + \beta_{1j} \text{Layout} + \varepsilon_{ij}$$

|                                                         | <i>Attractiveness</i>                 |                                         |                  | <i>Interestingness</i>                |                                         |                  | <i>Sympathy</i>                       |                                         |                  |
|---------------------------------------------------------|---------------------------------------|-----------------------------------------|------------------|---------------------------------------|-----------------------------------------|------------------|---------------------------------------|-----------------------------------------|------------------|
| <i>Predictors</i>                                       | <i>Estimates</i><br><i>[95%-CI]</i>   | <i>t</i>                                | <i>p</i>         | <i>Estimates</i><br><i>[95%-CI]</i>   | <i>t</i>                                | <i>p</i>         | <i>Estimates</i><br><i>[95%-CI]</i>   | <i>t</i>                                | <i>p</i>         |
| <b>Fixed Effects</b>                                    |                                       |                                         |                  |                                       |                                         |                  |                                       |                                         |                  |
| (Intercept)                                             | 0.469<br>[-2.135, 3.073]              | 0.354                                   | 0.724            | -7.648<br>[-10.271, -5.020]           | -5.725                                  | <0.001           | 2.245<br>[-0.270, 4.760]              | 1.754                                   | 0.081            |
| Layout                                                  | <b>2.896</b><br><b>[2.552, 3.239]</b> | <b>16.516</b>                           | <b>&lt;0.001</b> | <b>8.244</b><br><b>[7.836, 8.652]</b> | <b>39.581</b>                           | <b>&lt;0.001</b> | <b>4.494</b><br><b>[4.142, 4.845]</b> | <b>25.056</b>                           | <b>&lt;0.001</b> |
| <b>Random Part</b>                                      |                                       |                                         |                  |                                       |                                         |                  |                                       |                                         |                  |
| $\sigma^2$                                              |                                       | 233.60                                  |                  |                                       | 329.68                                  |                  |                                       | 244.47                                  |                  |
| $\tau_0^2$                                              |                                       | 124.17 <sub>Stim</sub>                  |                  |                                       | 62.69 <sub>Stim</sub>                   |                  |                                       | 94.45 <sub>Stim</sub>                   |                  |
| $\tau_0^2$                                              |                                       | 82.17 <sub>Sub</sub>                    |                  |                                       | 107.62 <sub>Sub</sub>                   |                  |                                       | 84.82 <sub>Sub</sub>                    |                  |
| ICC                                                     |                                       | 0.469                                   |                  |                                       | 0.341                                   |                  |                                       | 0.423                                   |                  |
| N                                                       |                                       | 190 <sub>Stim</sub> / 80 <sub>Sub</sub> |                  |                                       | 190 <sub>Stim</sub> / 80 <sub>Sub</sub> |                  |                                       | 190 <sub>Stim</sub> / 80 <sub>Sub</sub> |                  |
| Observations                                            |                                       | 30400                                   |                  |                                       | 30400                                   |                  |                                       | 30400                                   |                  |
| Conditional R <sup>2</sup> /<br>Marginal R <sup>2</sup> |                                       | 0.472 / 0.005                           |                  |                                       | 0.362 / 0.033                           |                  |                                       | 0.430 / 0.012                           |                  |

**Table S2 [continued].** LMM results predicting Ratings through the portrait's Layout.

|                                                         | <i>Trustworthiness</i>                |                                         |                  | <i>Wish-to-Meet</i>                   |                                         |                  | <i>ViewingTime</i>                    |                                         |                  |
|---------------------------------------------------------|---------------------------------------|-----------------------------------------|------------------|---------------------------------------|-----------------------------------------|------------------|---------------------------------------|-----------------------------------------|------------------|
| <i>Predictors</i>                                       | <i>Estimates</i><br><i>[95%-CI]</i>   | <i>t</i>                                | <i>p</i>         | <i>Estimates</i><br><i>[95%-CI]</i>   | <i>t</i>                                | <i>p</i>         | <i>Estimates [95%-CI]</i>             | <i>t</i>                                | <i>p</i>         |
| <b>Fixed Effects</b>                                    |                                       |                                         |                  |                                       |                                         |                  |                                       |                                         |                  |
| (Intercept)                                             | 1.465<br>[-0.905, 3.835]              | 1.215                                   | 0.226            | -7.009<br>[-9.659, -4.358]            | -5.20                                   | <0.001           | 9.764<br>[9.677, 9.853]               | 218.6<br>5                              | <0.001           |
| Layout                                                  | <b>5.110</b><br><b>[4.756, 5.463]</b> | <b>28.323</b>                           | <b>&lt;0.001</b> | <b>5.407</b><br><b>[5.025, 5.790]</b> | <b>27.71</b>                            | <b>&lt;0.001</b> | <b>0.101</b><br><b>[0.089, 0.113]</b> | <b>16.89</b>                            | <b>&lt;0.001</b> |
| <b>Random Part</b>                                      |                                       |                                         |                  |                                       |                                         |                  |                                       |                                         |                  |
| $\sigma^2$                                              |                                       | 247.36                                  |                  |                                       | 289.40                                  |                  |                                       | 0.271                                   |                  |
| $\tau_0^2$                                              |                                       | 56.66 <sub>Stim</sub>                   |                  |                                       | 65.71 <sub>Stim</sub>                   |                  |                                       | 0.151 <sub>Stim</sub>                   |                  |
| $\tau_0^2$                                              |                                       | 85.87 <sub>Sub</sub>                    |                  |                                       | 110.02 <sub>Sub</sub>                   |                  |                                       | 0.271 <sub>Sub</sub>                    |                  |
| ICC                                                     |                                       | 0.366                                   |                  |                                       | 0.378                                   |                  |                                       | 0.362                                   |                  |
| N                                                       |                                       | 190 <sub>Stim</sub> / 80 <sub>Sub</sub> |                  |                                       | 190 <sub>Stim</sub> / 80 <sub>Sub</sub> |                  |                                       | 190 <sub>Stim</sub> / 80 <sub>Sub</sub> |                  |
| Observations                                            |                                       | 30400                                   |                  |                                       | 30400                                   |                  |                                       | 30400                                   |                  |
| Conditional R <sup>2</sup> /<br>Marginal R <sup>2</sup> |                                       | 0.376 / 0.016                           |                  |                                       | 0.387 / 0.015                           |                  |                                       | 0.366 / 0.006                           |                  |

**Table S3.** LMM results predicting Attractiveness through the portrait's Layout (face, torso) and Status of the depicted person (musician, visual artist, non-artist), as well as the Attractiveness-Boost just through Status. To test H2, the following models have been fitted:

Model-A: Level 1:  $\text{Attractiveness}_{ij} = \beta_{0j} + \beta_{10} + \beta_{1j} \text{Layout}_{ij} * \beta_{2j} \text{Status}_{ij} + \varepsilon_{ij}$

Model-A-Boost: Level 1:  $\text{Attractiveness-Boost}_{ij} = \beta_{0j} + \beta_{10} + \beta_{1j} \text{Status}_{ij} + \varepsilon_{ij}$

| <i>Predictors</i>                                       | <i>Attractiveness (Model-A)</i>          |                                         |                  | <i>Attractiveness-Boost (Model-A-Boost)</i> |                                         |              |
|---------------------------------------------------------|------------------------------------------|-----------------------------------------|------------------|---------------------------------------------|-----------------------------------------|--------------|
|                                                         | <i>Estimates</i><br><i>[95%-CI]</i>      | <i>t</i>                                | <i>p</i>         | <i>Estimates</i><br><i>[95%-CI]</i>         | <i>t</i>                                | <i>p</i>     |
| <b>Fixed Effects</b>                                    |                                          |                                         |                  |                                             |                                         |              |
| (Intercept)                                             | 0.0285<br>[-2.969, 3.026]                | 0.019                                   | 0.985            | 3.327<br>[2.6, 4.05]                        | 8.968                                   | <0.001       |
| Layout                                                  | <b>3.327</b><br><b>[2.864, 3.789]</b>    | <b>14.11</b>                            | <b>&lt;0.001</b> |                                             |                                         |              |
| Status: M<Non                                           | 0.465<br>[-3.102, 4.033]                 | 0.255                                   | 0.798            | <b>-1.226</b><br><b>[-2.053, -0.401]</b>    | <b>2.907</b>                            | <b>0.004</b> |
| Status: V<Non                                           | 3.222<br>[-2.956, 9.402]                 | 1.021                                   | 0.308            | 0.165<br>[-1.264, 1.596]                    | 0.227                                   | 0.821        |
| Status: M<V                                             | -2.757<br>[-9.146, 3.631]                | -0.845                                  | 0.399            | -1.392<br>[-2.871, 0.0865]                  | -1.843                                  | 0.067        |
| L*S: M<Non                                              | <b>-1.227</b><br><b>[-1.961, -0.493]</b> | <b>-3.276</b>                           | <b>0.001</b>     |                                             |                                         |              |
| L*S: V<Non                                              | 0.166<br>[-1.105, 1.437]                 | 0.256                                   | 0.798            |                                             |                                         |              |
| L*S: M<V                                                | <b>-1.392</b><br><b>[-2.707, -0.079]</b> | <b>-2.077</b>                           | <b>0.038</b>     |                                             |                                         |              |
| <b>Random Part</b>                                      |                                          |                                         |                  |                                             |                                         |              |
| $\sigma^2$                                              |                                          | 233.52                                  |                  |                                             | 247.942                                 |              |
| $\tau_0^2$                                              |                                          | 123.83 <sub>Stim</sub>                  |                  |                                             | 4.316 <sub>Stim</sub>                   |              |
| $\tau_0^2$                                              |                                          | 82.17 <sub>Sub</sub>                    |                  |                                             | 5.362 <sub>Sub</sub>                    |              |
| ICC                                                     |                                          | 0.469                                   |                  |                                             | 0.038                                   |              |
| N                                                       |                                          | 190 <sub>Stim</sub> / 80 <sub>Sub</sub> |                  |                                             | 190 <sub>Stim</sub> / 80 <sub>Sub</sub> |              |
| Observations                                            |                                          | 30400                                   |                  |                                             | 15200                                   |              |
| Conditional R <sup>2</sup> /<br>Marginal R <sup>2</sup> |                                          | 0.473 / 0.009                           |                  |                                             | 0.039 / 0.001                           |              |

**Table S4a.** LMM results predicting Attractiveness-Boost through Status of the depicted person (musician, visual artist, non-artist) and the stimulus' gender (male, female) interacting with the rater's gender (male, female). To test H3a, the following model has been fitted:

$$\text{Level 1: AttractivenessBoost}_{ij} = \beta_{0j} + \beta_{i0} + \beta_{1j} \text{Status}_{ij} + \beta_{2j} \text{Stim\_Gender}_{ij} * \beta_{3j} \text{Rater\_Gender}_{ij} + \varepsilon_{ij}$$

| <i>AttractivenessBoost</i>                              |                                          |               |              |
|---------------------------------------------------------|------------------------------------------|---------------|--------------|
| <i>Predictors</i>                                       | <i>Estimates</i><br><i>[95%-CI]</i>      | <i>t</i>      | <i>p</i>     |
| <b>Fixed Effects</b>                                    |                                          |               |              |
| (Intercept)                                             | 3.232<br>[2.181, 4.284]                  | 5.997         | <0.001       |
| Status: M<Non                                           | <b>-1.222</b><br><b>[-2.042, -0.402]</b> | <b>-2.911</b> | <b>0.004</b> |
| Status: V<Non                                           | 0.176<br>[-1.244, 1.595]                 | 0.241         | 0.809        |
| Status: M<V                                             | -1.398<br>[-2.865, 0.07]                 | -1.859        | 0.065        |
| Stim_Gen: m<f                                           | 0.441<br>[-0.489, 1.371]                 | 0.927         | 0.355        |
| Rater_Gen: m<f                                          | -0.482<br>[-1.729, 0.765]                | -0.756        | 0.451        |
| S_Gen*R_Gen: m<f                                        | 0.447<br>[-0.556, 1.45]                  | 0.874         | 0.382        |
| <b>Random Part</b>                                      |                                          |               |              |
| $\sigma^2$                                              | 247.946                                  |               |              |
| $\tau_0^2$                                              | 4.239 <sub>Stim</sub>                    |               |              |
| $\tau_0^2$                                              | 5.431 <sub>Sub</sub>                     |               |              |
| ICC                                                     | 0.038                                    |               |              |
| N                                                       | 190 <sub>Stim</sub> / 80 <sub>Sub</sub>  |               |              |
| Observations                                            | 15200                                    |               |              |
| Conditional R <sup>2</sup> /<br>Marginal R <sup>2</sup> | 0.039 / 0.002                            |               |              |

**Table S4b.** LMM results for a reduced data set of female raters and male portraits, predicting Attractiveness-Boost through Status of the depicted person (musician, visual artist, non-artist). This is thus a modified version of Model-A-Boost for a reduced data set:

$$\text{Level 1: Attractiveness-Boost}_{ij} = \beta_{0j} + \beta_{10} + \beta_{1j} \text{Status}_{ij} + \varepsilon_{ij}$$

| <i>AttractivenessBoost</i>                              |                                     |                                        |          |
|---------------------------------------------------------|-------------------------------------|----------------------------------------|----------|
| <i>Predictors</i>                                       | <i>Estimates</i><br><i>[95%-CI]</i> | <i>t</i>                               | <i>p</i> |
| <b>Fixed Effects</b>                                    |                                     |                                        |          |
| (Intercept)                                             | 3.668<br>[2.490, 4.884]             | 6.092                                  | <0.001   |
| Status: M<Non                                           | -1.153<br>[-2.631, 0.324]           | -1.525                                 | 0.131    |
| Status: V<Non                                           | -0.471<br>[-3.05, 2.108]            | -0.357                                 | 0.722    |
| Status: M<V                                             | -0.682<br>[-3.35, 1.986]            | -0.5                                   | 0.618    |
| <b>Random Part</b>                                      |                                     |                                        |          |
| $\sigma^2$                                              |                                     | 287.413                                |          |
| $\tau_0^2$                                              |                                     | 5.296 <sub>Stim</sub>                  |          |
| $\tau_0^2$                                              |                                     | 5.779 <sub>Sub</sub>                   |          |
| ICC                                                     |                                     | 0.037                                  |          |
| N                                                       |                                     | 97 <sub>Stim</sub> / 42 <sub>Sub</sub> |          |
| Observations                                            |                                     | 4074                                   |          |
| Conditional R <sup>2</sup> /<br>Marginal R <sup>2</sup> |                                     | 0.038 / 0.001                          |          |

**Table S4c.** LMM results for a reduced data set of male raters and female portraits, predicting Attractiveness-Boost through Status of the depicted person (musician, visual artist, non-artist). This is thus a modified version of Model-A-Boost for a reduced data set:

$$\text{Level 1: Attractiveness-Boost}_{ij} = \beta_{0j} + \beta_{10} + \beta_{1j} \text{Status}_{ij} + \varepsilon_{ij}$$

| <i>AttractivenessBoost</i>                              |                                          |                                        |              |
|---------------------------------------------------------|------------------------------------------|----------------------------------------|--------------|
| <i>Predictors</i>                                       | <i>Estimates</i><br><i>[95%-CI]</i>      | <i>t</i>                               | <i>p</i>     |
| <b>Fixed Effects</b>                                    |                                          |                                        |              |
| (Intercept)                                             | 3.424<br>[2.205, 4.642]                  | 5.504                                  | <0.001       |
| Status: M<Non                                           | <b>-1.96</b><br><b>[-3.348, -0.573]</b>  | <b>-1.525</b>                          | <b>0.007</b> |
| Status: V<Non                                           | 1.086<br>[-1.297, 3.469]                 | 0.891                                  | 0.375        |
| Status: M<V                                             | <b>-3.046</b><br><b>[-5.509, -0.584]</b> | <b>-2.418</b>                          | <b>0.018</b> |
| <b>Random Part</b>                                      |                                          |                                        |              |
| $\sigma^2$                                              |                                          | 217.494                                |              |
| $\tau_0^2$                                              |                                          | 4.552 <sub>Stim</sub>                  |              |
| $\tau_0^2$                                              |                                          | 7.052 <sub>Sub</sub>                   |              |
| ICC                                                     |                                          | 0.051                                  |              |
| N                                                       |                                          | 93 <sub>Stim</sub> / 38 <sub>Sub</sub> |              |
| Observations                                            |                                          | 3534                                   |              |
| Conditional R <sup>2</sup> /<br>Marginal R <sup>2</sup> |                                          | 0.055 / 0.005                          |              |



**Table S5.** LMM results predicting Attractiveness-Boost through mean facial attractiveness interacting with the Status of the depicted person (musician, visual artist, non-artist). To test H3b, the following model has been fitted:

$$\text{Level 1: Attractiveness-Boost}_{ij} = \beta_{0j} + \beta_{10} + \beta_{1j} \text{MeanFacialAttractiveness}_{ij} * \beta_{2j} \text{Status}_{ij} + \varepsilon_{ij}$$

| <i>Attractiveness-Boost</i>                          |                                          |                                         |              |
|------------------------------------------------------|------------------------------------------|-----------------------------------------|--------------|
| <i>Predictors</i>                                    | <i>Estimates</i><br><i>[95%-CI]</i>      | <i>t</i>                                | <i>p</i>     |
| <b>Fixed Effects</b>                                 |                                          |                                         |              |
| (Intercept)                                          | 3.386<br>[2.647, 4.125]                  | 8.941                                   | <0.001       |
| MeanFacialAttract                                    | -0.017<br>[-0.063, 0.028]                | -0.745                                  | 0.457        |
| <b>Status: M&lt;Non</b>                              | <b>-1.146</b><br><b>[-1.989, -0.302]</b> | <b>-2.637</b>                           | <b>0.009</b> |
| Status: V<Non                                        | -0.112<br>[-1.787, 1.562]                | -0.13                                   | 0.897        |
| Status: M<V                                          | -1.034<br>[-2.748, 0.681]                | -1.171                                  | 0.243        |
| MFA*S: M<Non                                         | -0.036<br>[-0.109, 0.036]                | -0.976                                  | 0.33         |
| MFA*S: V<Non                                         | 0.05<br>[-0.089, 0.189]                  | 0.7                                     | 0.485        |
| MFA*S: M<V                                           | -0.086<br>[-0.229, 0.056]                | -1.177                                  | 0.241        |
| <b>Random Part</b>                                   |                                          |                                         |              |
| $\sigma^2$                                           |                                          | 247.942                                 |              |
| $\tau_0^2$                                           |                                          | 4.266 <sub>Stim</sub>                   |              |
| $\tau_0^2$                                           |                                          | 5.362 <sub>Sub</sub>                    |              |
| ICC                                                  |                                          | 0.037                                   |              |
| N                                                    |                                          | 190 <sub>Stim</sub> / 80 <sub>Sub</sub> |              |
| Observations                                         |                                          | 15200                                   |              |
| Conditional R <sup>2</sup> / Marginal R <sup>2</sup> |                                          | 0.039 / 0.002                           |              |

**Table S6.** LMM results predicting Interestingness through the portrait's Layout (face, torso) and Status of the depicted person (musician, visual artist, non-artist) as well as the Interestingness-Boost just through Status. To test H2, the following models have been fitted:

Model-I: Level 1:  $\text{Interestingness}_{ij} = \beta_{0j} + \beta_{i0} + \beta_{1j} \text{Layout}_{ij} * \beta_{2j} \text{Status}_{ij} + \varepsilon_{ij}$

Model-I-Boost: Level 1:  $\text{Interestingness-Boost}_{ij} = \beta_{0j} + \beta_{i0} + \beta_{1j} \text{Status}_{ij} + \varepsilon_{ij}$

| <i>Predictors</i>                                       | <i>Interestingness (Model-I)</i>         |                                         |                  | <i>Interestingness-Boost (Model-I-Boost)</i> |                                         |                  |
|---------------------------------------------------------|------------------------------------------|-----------------------------------------|------------------|----------------------------------------------|-----------------------------------------|------------------|
|                                                         | <i>Estimates</i><br><i>[95%-CI]</i>      | <i>t</i>                                | <i>p</i>         | <i>Estimates</i><br><i>[95%-CI]</i>          | <i>t</i>                                | <i>p</i>         |
| <b>Fixed Effects</b>                                    |                                          |                                         |                  |                                              |                                         |                  |
| (Intercept)                                             | -8.123<br>[-10.962, -5.284]              | -5.611                                  | <0.001           | 7.437<br>[5.772, 9.102]                      | 8.763                                   | <0.001           |
| <b>Layout</b>                                           | <b>7.437</b><br><b>[6.889, 7.986]</b>    | <b>26.569</b>                           | <b>&lt;0.001</b> |                                              |                                         |                  |
| Status: M<Non                                           | 1.558<br>[-1.134, 4.251]                 | 1.133                                   | 0.258            | 0.885<br>[-0.657, 2.428]                     | 1.124                                   | 0.263            |
| Status: V>Non                                           | -1.052<br>[-5.715, 4.251]                | -0.441                                  | 0.659            | <b>5.760</b><br><b>[3.089, 8.432]</b>        | <b>4.222</b>                            | <b>&lt;0.001</b> |
| Status: M<V                                             | 2.610<br>[-2.211, 7.432]                 | 1.059                                   | 0.290            | <b>-4.875</b><br><b>[-7.637, -2.113]</b>     | <b>-3.456</b>                           | <b>&lt;0.001</b> |
| <b>L*S: M&gt;Non</b>                                    | <b>0.885</b><br><b>[0.014, 1.756]</b>    | <b>1.992</b>                            | <b>0.046</b>     |                                              |                                         |                  |
| <b>L*S: V&gt;Non</b>                                    | <b>5.760</b><br><b>[4.252, 7.269]</b>    | <b>7.483</b>                            | <b>&lt;0.001</b> |                                              |                                         |                  |
| <b>L*S: M&lt;V</b>                                      | <b>-4.875</b><br><b>[-6.435, -3.315]</b> | <b>-6.125</b>                           | <b>&lt;0.001</b> |                                              |                                         |                  |
| <b>Random Part</b>                                      |                                          |                                         |                  |                                              |                                         |                  |
| $\sigma^2$                                              |                                          | 329.09                                  |                  |                                              | 436.76                                  |                  |
| $\tau_0^2$                                              |                                          | 58.27 <sub>Stim</sub>                   |                  |                                              | 20.38 <sub>Stim</sub>                   |                  |
| $\tau_0^2$                                              |                                          | 107.62 <sub>Sub</sub>                   |                  |                                              | 37.93 <sub>Sub</sub>                    |                  |
| ICC                                                     |                                          | 0.335                                   |                  |                                              | 0.118                                   |                  |
| N                                                       |                                          | 190 <sub>Stim</sub> / 80 <sub>Sub</sub> |                  |                                              | 190 <sub>Stim</sub> / 80 <sub>Sub</sub> |                  |
| Observations                                            |                                          | 30400                                   |                  |                                              | 15200                                   |                  |
| Conditional R <sup>2</sup> /<br>Marginal R <sup>2</sup> |                                          | 0.364 / 0.044                           |                  |                                              | 0.122 / 0.005                           |                  |

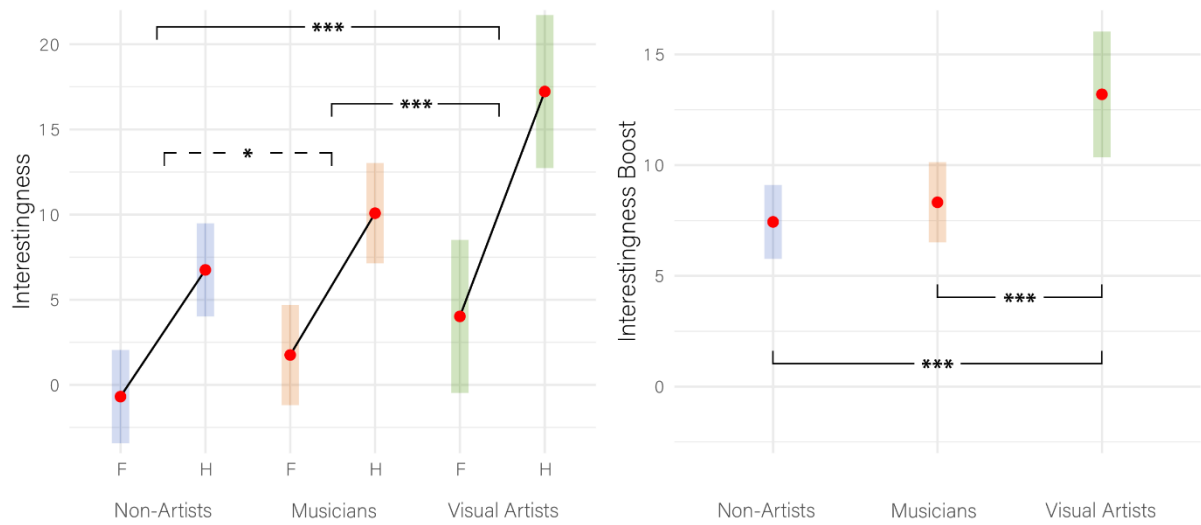

**Figure S3.** LMM results for Interestingness ratings (cf. Table S6). Left: EMMs including 95 % CI boundaries for facial portraits (F) and half-length torsos (H) across the three Status groups. The boosting effect is significantly steeper for both musicians ( $*p < 0.05$ ) and visual artists ( $***p < 0.001$ ) as compared to non-artists. Among each other, the visual artists' boost is steeper than the boost of musicians ( $***p < 0.001$ ). Right: The boost in Interestingness from torsos to facials is significantly higher for visual artists as compared to both musicians and non-artists ( $***p < 0.001$ ). Due to the stricter way of testing in this approach, the difference between musicians and non-artists is no longer significant ( $p = 0.263$ ), but only visible by trend.

**Table S7.** LMM results predicting Sympathy through the portrait's Layout (face, torso) and Status of the depicted person (musician, visual artist, non-artist) as well as the Sympathy-Boost just through Status. To test H2, the following models have been fitted:

Model-S: Level 1:  $\text{Sympathy}_{ij} = \beta_{0j} + \beta_{i0} + \beta_{1j} \text{Layout}_{ij} * \beta_{2j} \text{Status}_{ij} + \varepsilon_{ij}$

Model-S-Boost: Level 1:  $\text{Sympathy-Boost}_{ij} = \beta_{0j} + \beta_{i0} + \beta_{1j} \text{Status}_{ij} + \varepsilon_{ij}$

| <i>Predictors</i>                                       | <i>Sympathy (Model-S)</i>                |               |                  | <i>Sympathy-Boost (Model-S-Boost)</i>   |          |          |
|---------------------------------------------------------|------------------------------------------|---------------|------------------|-----------------------------------------|----------|----------|
|                                                         | <i>Estimates<br/>[95%-CI]</i>            | <i>t</i>      | <i>p</i>         | <i>Estimates<br/>[95%-CI]</i>           | <i>t</i> | <i>p</i> |
| <b>Fixed Effects</b>                                    |                                          |               |                  |                                         |          |          |
| (Intercept)                                             | 1.893<br>[-0.951, 4.737]                 | 1.303         | 0.194            | 4.821<br>[3.813, 5.828]                 | 9.361    | <0.001   |
| <b>Layout</b>                                           | <b>4.820</b><br><b>[4.348, 5.293]</b>    | <b>19.982</b> | <b>&lt;0.001</b> |                                         |          |          |
| Status: M<Non                                           | 0.580<br>[-2.603, 3.763]                 | 0.357         | 0.722            | -0.948<br>[-2.220, 0.324]               | -1.459   | 0.146    |
| Status: V<Non                                           | 1.676<br>[-3.836, 7.189]                 | 0.595         | 0.552            | 0.209<br>[-1.993, 2.411]                | 0.186    | 0.853    |
| Status: M<V                                             | -1.096<br>[-6.796, 4.603]                | -0.376        | 0.707            | -1.157<br>[-3.434, 1.120]               | -0.994   | 0.321    |
| <b>L*S: M&lt;Non</b>                                    | <b>-0.948</b><br><b>[-1.699, -0.197]</b> | <b>-2.474</b> | <b>0.013</b>     |                                         |          |          |
| L*S: V>Non                                              | 0.209<br>[-1.091, 1.509]                 | 0.315         | 0.752            |                                         |          |          |
| L*S: M<V                                                | -1.157<br>[-2.501, 0.187]                | -1.687        | 0.092            |                                         |          |          |
| <b>Random Part</b>                                      |                                          |               |                  |                                         |          |          |
| $\sigma^2$                                              | 244.43                                   |               |                  | 301.236                                 |          |          |
| $\tau_0^2$                                              | 94.90 <sub>Stim</sub>                    |               |                  | 13.818 <sub>Stim</sub>                  |          |          |
| $\tau_0^2$                                              | 84.82 <sub>Sub</sub>                     |               |                  | 7.817 <sub>Sub</sub>                    |          |          |
| ICC                                                     | 0.424                                    |               |                  | 0.067                                   |          |          |
| N                                                       | 190 <sub>Stim</sub> / 80 <sub>Sub</sub>  |               |                  | 190 <sub>Stim</sub> / 80 <sub>Sub</sub> |          |          |
| Observations                                            | 30400                                    |               |                  | 15200                                   |          |          |
| Conditional R <sup>2</sup> /<br>Marginal R <sup>2</sup> | 0.431 / 0.013                            |               |                  | 0.068 / 0.001                           |          |          |

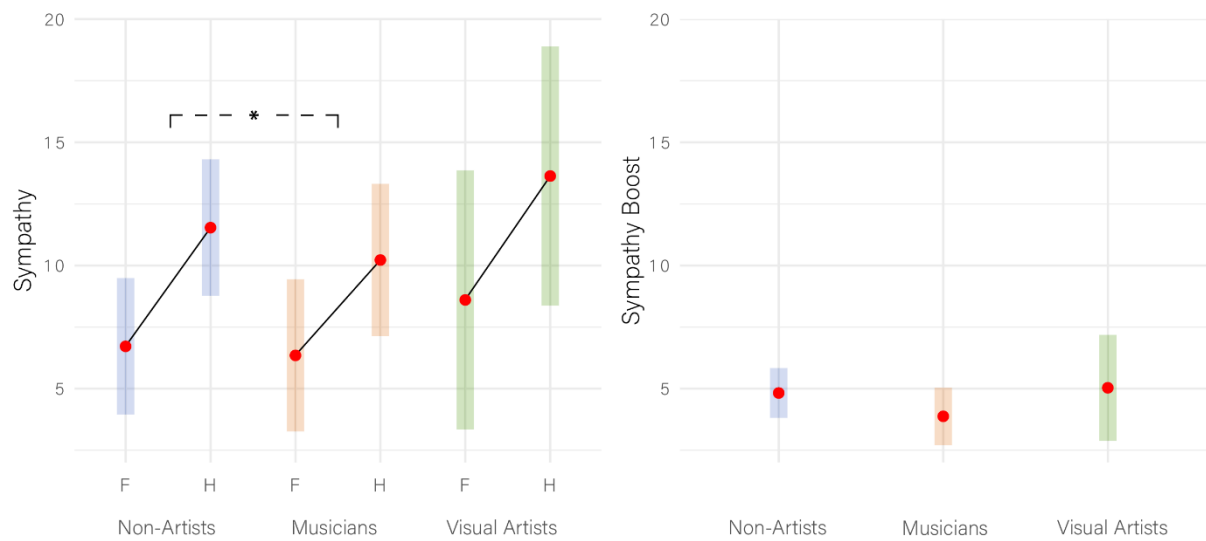

**Figure S4.** LMM results for Sympathy ratings (cf. Table S7). Left: EMMs including 95 % CI boundaries for facial portraits (F) and half-length torsos (H) across the three Status groups. The boosting effect is significantly steeper for non-artists as compared to musicians ( $*p < 0.05$ ). Right: The boost in Sympathy from torsos to facials is not significantly different between the three status groups. Due to the stricter way of testing in this approach, the difference between musicians and non-artists is no longer significant ( $p = 0.146$ ), but only visible by trend.

**Table S8.** LMM results predicting Trustworthiness through the portrait's Layout (face, torso) and Status of the depicted person (musician, visual artist, non-artist) as well as the Trustworthiness-Boost just through Status. To test H2, the following models have been fitted:

Model-T: Level 1:  $\text{Trustworthiness}_{ij} = \beta_{0j} + \beta_{i0} + \beta_{1j} \text{Layout}_{ij} * \beta_{2j} \text{Status}_{ij} + \varepsilon_{ij}$

Model-T-Boost: Level 1:  $\text{Trustworthiness-Boost}_{ij} = \beta_{0j} + \beta_{i0} + \beta_{1j} \text{Status}_{ij} + \varepsilon_{ij}$

| <i>Predictors</i>                                       | <i>Trustworthiness (Model-T)</i>         |                                         |                  | <i>Trustworthiness-Boost (Model-T-Boost)</i> |                                         |                  |
|---------------------------------------------------------|------------------------------------------|-----------------------------------------|------------------|----------------------------------------------|-----------------------------------------|------------------|
|                                                         | <i>Estimates<br/>[95%-CI]</i>            | <i>t</i>                                | <i>p</i>         | <i>Estimates<br/>[95%-CI]</i>                | <i>t</i>                                | <i>p</i>         |
| <b>Fixed Effects</b>                                    |                                          |                                         |                  |                                              |                                         |                  |
| (Intercept)                                             | 0.513<br>[-2.084, 3.110]                 | 0.388                                   | 0.699            | 6.118<br>[4.963, 7.274]                      | 10.367                                  | <0.001           |
| <b>Layout</b>                                           | <b>6.118</b><br><b>[5.643, 6.594]</b>    | <b>25.226</b>                           | <b>&lt;0.001</b> |                                              |                                         |                  |
| Status: M<Non                                           | 1.682<br>[-0.884, 4.247]                 | 1.283                                   | 0.201            | <b>-2.381</b><br><b>[-3.714, -1.049]</b>     | <b>-3.499</b>                           | <b>&lt;0.001</b> |
| Status: V<Non                                           | 4.048<br>[-0.394, 8.491]                 | 1.783                                   | 0.076            | -1.706<br>[-4.013, 0.602]                    | -1.447                                  | 0.150            |
| Status: M<V                                             | -2.367<br>[-6.960, 2.227]                | -1.008                                  | 0.314            | -0.676<br>[-3.061, 1.710]                    | -0.554                                  | 0.580            |
| <b>L*S: M&lt;Non</b>                                    | <b>-2.381</b><br><b>[-3.136, -1.627]</b> | <b>-6.183</b>                           | <b>&lt;0.001</b> |                                              |                                         |                  |
| <b>L*S: V&lt;Non</b>                                    | <b>-1.706</b><br><b>[-3.013, -0.399]</b> | <b>-2.557</b>                           | <b>0.011</b>     |                                              |                                         |                  |
| L*S: M<V                                                | -0.676<br>[-2.027, 0.676]                | -0.980                                  | 0.327            |                                              |                                         |                  |
| <b>Random Part</b>                                      |                                          |                                         |                  |                                              |                                         |                  |
| $\sigma^2$                                              |                                          | 247.05                                  |                  |                                              | 17.983                                  |                  |
| $\tau_0^2$                                              |                                          | 56.10 <sub>Stim</sub>                   |                  |                                              | 15.25 <sub>Stim</sub>                   |                  |
| $\tau_0^2$                                              |                                          | 85.87 <sub>Sub</sub>                    |                  |                                              | 13.17 <sub>Sub</sub>                    |                  |
| ICC                                                     |                                          | 0.365                                   |                  |                                              | 0.081                                   |                  |
| N                                                       |                                          | 190 <sub>Stim</sub> / 80 <sub>Sub</sub> |                  |                                              | 190 <sub>Stim</sub> / 80 <sub>Sub</sub> |                  |
| Observations                                            |                                          | 30400                                   |                  |                                              | 15200                                   |                  |
| Conditional R <sup>2</sup> /<br>Marginal R <sup>2</sup> |                                          | 0.378 / 0.020                           |                  |                                              | 0.084 / 0.004                           |                  |

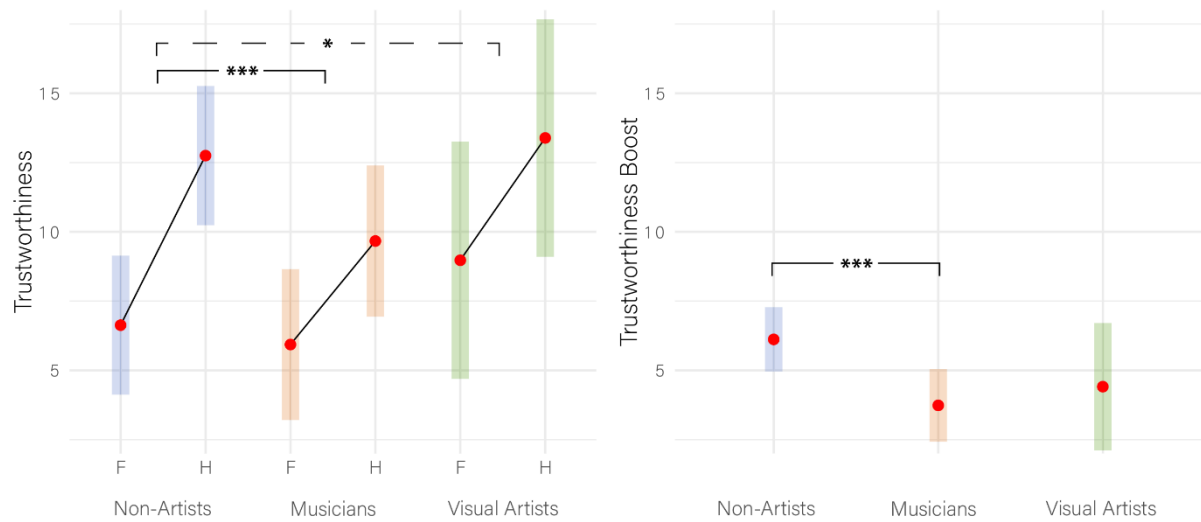

**Figure S5.** LMM results for Trustworthiness ratings (cf. Table S8). Left: EMMs including 95 % CI boundaries for facial portraits (F) and half-length torsos (H) across the three Status groups. The boosting effect of non-artists is significantly steeper than that of musicians ( $***p < 0.001$ ) and visual artists ( $*p < 0.05$ ). Right: The boost in Trustworthiness from torsos to facials is significantly higher for non-artists as compared to musicians ( $***p < 0.001$ ). Due to the stricter way of testing in this approach, the difference between non-artists and visuals artists is no longer significant ( $p = 0.15$ ), but only visible by trend.

**Table S9.** LMM results predicting Wish-to-Meet through the portrait's Layout (face, torso) and Status of the depicted person (musician, visual artist, non-artist) as well as the Wish-to-Meet-Boost just through Status. To test H2, the following models have been fitted:

Model-M: Level 1:  $\text{Wish-to-Meet}_{ij} = \beta_{0j} + \beta_{10} + \beta_{1j} \text{Layout}_{ij} * \beta_{2j} \text{Status}_{ij} + \varepsilon_{ij}$

Model-M-Boost: Level 1:  $\text{Wish-to-Meet-Boost}_{ij} = \beta_{0j} + \beta_{10} + \beta_{1j} \text{Status}_{ij} + \varepsilon_{ij}$

| <i>Predictors</i>                                       | <i>Wish-to-Meet (Model-M)</i>            |                                         |                  | <i>Wish-to-Meet-Boost (Model-M-Boost)</i> |                                         |              |
|---------------------------------------------------------|------------------------------------------|-----------------------------------------|------------------|-------------------------------------------|-----------------------------------------|--------------|
|                                                         | <i>Estimates</i><br><i>[95%-CI]</i>      | <i>t</i>                                | <i>p</i>         | <i>Estimates</i><br><i>[95%-CI]</i>       | <i>t</i>                                | <i>p</i>     |
| <b>Fixed Effects</b>                                    |                                          |                                         |                  |                                           |                                         |              |
| (Intercept)                                             | -7.435<br>[-10.315, -4.556]              | -5.064                                  | <0.001           | 5.254<br>[4.142, 6.365]                   | 9.264                                   | <0.001       |
| <b>Layout</b>                                           | <b>5.254</b><br><b>[4.739, 5.768]</b>    | <b>20.019</b>                           | <b>&lt;0.001</b> |                                           |                                         |              |
| Status: M<Non                                           | 0.775<br>[-1.972, 3.521]                 | 0.552                                   | 0.581            | -0.206<br>[-1.381, 0.968]                 | -0.344                                  | 0.731        |
| Status: V>Non                                           | 1.727<br>[-3.030, 6.483]                 | 0.711                                   | 0.478            | <b>2.712</b><br><b>[0.678, 4.746]</b>     | <b>2.610</b>                            | <b>0.010</b> |
| Status: M<V                                             | -0.952<br>[-5.870, 3.965]                | -0.379                                  | 0.705            | <b>-2.918</b><br><b>[-5.021, -0.815]</b>  | <b>-2.717</b>                           | <b>0.007</b> |
| L*S: M<Non                                              | -0.206<br>[-1.023, 0.610]                | -0.495                                  | 0.620            |                                           |                                         |              |
| <b>L*S: V&gt;Non</b>                                    | <b>2.720</b><br><b>[1.297, 4.126]</b>    | <b>3.758</b>                            | <b>&lt;0.001</b> |                                           |                                         |              |
| <b>L*S: M&lt;V</b>                                      | <b>-2.918</b><br><b>[-4.381, -1.456]</b> | <b>-3.911</b>                           | <b>&lt;0.001</b> |                                           |                                         |              |
| <b>Random Part</b>                                      |                                          |                                         |                  |                                           |                                         |              |
| $\sigma^2$                                              |                                          | 289.27                                  |                  |                                           | 354.29                                  |              |
| $\tau_0^2$                                              |                                          | 63.91 <sub>Stim</sub>                   |                  |                                           | 10.56 <sub>Stim</sub>                   |              |
| $\tau_0^2$                                              |                                          | 110.02 <sub>Sub</sub>                   |                  |                                           | 14.31 <sub>Sub</sub>                    |              |
| ICC                                                     |                                          | 0.376                                   |                  |                                           | 0.081                                   |              |
| N                                                       |                                          | 190 <sub>Stim</sub> / 80 <sub>Sub</sub> |                  |                                           | 190 <sub>Stim</sub> / 80 <sub>Sub</sub> |              |
| Observations                                            |                                          | 30400                                   |                  |                                           | 15200                                   |              |
| Conditional R <sup>2</sup> /<br>Marginal R <sup>2</sup> |                                          | 0.389 / 0.021                           |                  |                                           | 0.084 / 0.004                           |              |



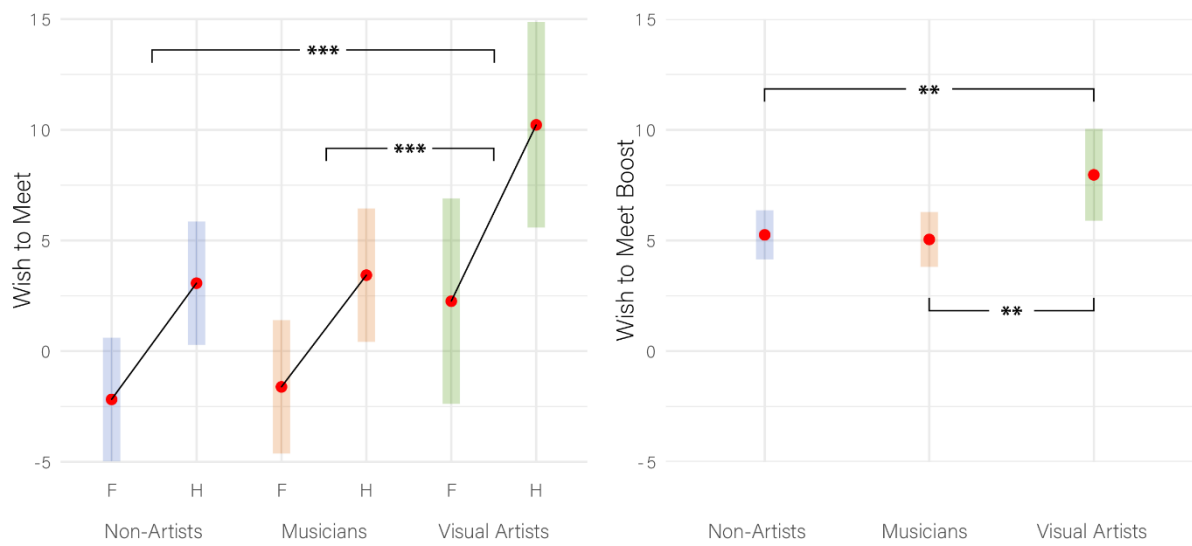

**Figure S6.** LMM results for Wish-to-Meet ratings (cf. Table S9). Left: EMMs including 95 % CI boundaries for facial portraits (F) and half-length torsos (H) across the three Status groups. The boosting effect of visual artists is significantly steeper than that for musicians and non-artists ( $***p < 0.001$ ). Right: The same result pattern is reflected in the Model-M-Boost: The boost in Wish-to-Meet from torsos to facials is significantly higher for visual artists than for both non-artists and musicians ( $**p < 0.01$ ).

**Table S10.** LMM results predicting ViewingTime through the portrait's Layout (face, torso) and Status of the depicted person (musician, visual artist, non-artist) as well as the ViewingTime-Boost just through Status. To test H2, the following models have been fitted:

Model-V: Level 1:  $\text{ViewingTime}_{ij} = \beta_{0j} + \beta_{i0} + \beta_{1j} \text{Layout}_{ij} * \beta_{2j} \text{Status}_{ij} + \varepsilon_{ij}$

Model-V-Boost: Level 1:  $\text{ViewingTime-Boost}_{ij} = \beta_{0j} + \beta_{i0} + \beta_{1j} \text{Status}_{ij} + \varepsilon_{ij}$

| <i>Predictors</i>                                       | <i>ViewingTime (Model-V)</i>             |                                         |                  | <i>ViewingTime-Boost (Model-V-Boost)</i> |                                         |              |
|---------------------------------------------------------|------------------------------------------|-----------------------------------------|------------------|------------------------------------------|-----------------------------------------|--------------|
|                                                         | <i>Estimates<br/>[95%-CI]</i>            | <i>t</i>                                | <i>p</i>         | <i>Estimates<br/>[95%-CI]</i>            | <i>t</i>                                | <i>p</i>     |
| <b>Fixed Effects</b>                                    |                                          |                                         |                  |                                          |                                         |              |
| (Intercept)                                             | 9.745<br>[9.655, 9.835]                  | 213.768                                 | <0.001           | 0.116<br>[0.093, 0.140]                  | 9.687                                   | <0.001       |
| <b>Layout</b>                                           | <b>0.116</b><br><b>[0.100, 0.132]</b>    | <b>14.442</b>                           | <b>&lt;0.001</b> |                                          |                                         |              |
| <b>Status: M&lt;Non</b>                                 | <b>0.062</b><br><b>[0.019, 0.104]</b>    | <b>2.827</b>                            | <b>0.005</b>     | <b>-0.050</b><br><b>[-0.082, -0.018]</b> | <b>-3.047</b>                           | <b>0.003</b> |
| Status: V<Non                                           | -0.032<br>[-0.106, 0.042]                | -0.856                                  | 0.392            | 0.035<br>[-0.020, 0.090]                 | 1.234                                   | 0.219        |
| <b>Status: M&lt;V</b>                                   | <b>0.094</b><br><b>[0.017, 0.170]</b>    | <b>2.406</b>                            | <b>0.016</b>     | <b>-0.085</b><br><b>[-0.142, -0.027]</b> | <b>-2.896</b>                           | <b>0.004</b> |
| <b>L*S: M&lt;Non</b>                                    | <b>-0.049</b><br><b>[-0.075, -0.025]</b> | <b>-3.901</b>                           | <b>&lt;0.001</b> |                                          |                                         |              |
| L*S: V<Non                                              | 0.035<br>[-0.008, 0.078]                 | 1.580                                   | 0.114            |                                          |                                         |              |
| <b>L*S: M&lt;V</b>                                      | <b>-0.085</b><br><b>[-0.129, -0.039]</b> | <b>-3.707</b>                           | <b>&lt;0.001</b> |                                          |                                         |              |
| <b>Random Part</b>                                      |                                          |                                         |                  |                                          |                                         |              |
| $\sigma^2$                                              |                                          | 0.271                                   |                  |                                          | 0.554                                   |              |
| $\tau_0^2$                                              |                                          | 0.003 <sub>Stim</sub>                   |                  |                                          | 0.004 <sub>Stim</sub>                   |              |
| $\tau_0^2$                                              |                                          | 0.151 <sub>Sub</sub>                    |                  |                                          | 0.003 <sub>Sub</sub>                    |              |
| ICC                                                     |                                          | 0.362                                   |                  |                                          | 0.013                                   |              |
| N                                                       |                                          | 190 <sub>Stim</sub> / 80 <sub>Sub</sub> |                  |                                          | 190 <sub>Stim</sub> / 80 <sub>Sub</sub> |              |
| Observations                                            |                                          | 30400                                   |                  |                                          | 15200                                   |              |
| Conditional R <sup>2</sup> /<br>Marginal R <sup>2</sup> |                                          | 0.366 / 0.007                           |                  |                                          | 0.014 / 0.001                           |              |

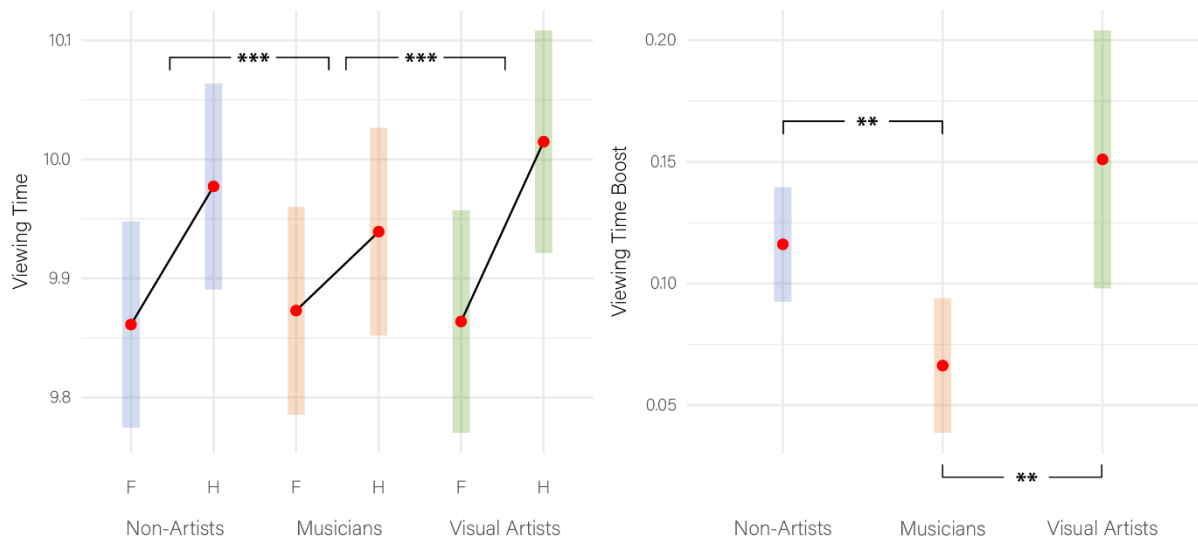

**Figure S7.** LMM results for ViewingTime (cf. Table S10). Left: EMMs including 95 % CI boundaries for facial portraits (F) and half-length torsos (H) across the three Status groups. The boosting effect is significantly flatter for musicians as compared to both non-artists and visual artists ( $***p < 0.001$ ). Right: The same result pattern is reflected in the Model-V-Boost: The boost in ViewingTime from torsos to facials is significantly lower for musicians as compared to the other two Status groups ( $**p < 0.01$ ).

**Table S11.** LMM results predicting Interestingness-Boost through Status of the depicted person (musician, visual artist, non-artist) and the stimulus' gender (male, female) interacting with the rater's gender (male, female). To test H3a, the following model has been fitted:

$$\text{Level 1: Interestingness-Boost}_{ij} = \beta_{0j} + \beta_{10} + \beta_{1j} \text{Status}_{ij} + \beta_{2j} \text{Stim\_Gender}_{ij} * \beta_{3j} \text{Rater\_Gender}_{ij} + \varepsilon_{ij}$$

| <i>Interestingness-Boost</i>                            |                                          |                                         |                  |
|---------------------------------------------------------|------------------------------------------|-----------------------------------------|------------------|
| <i>Predictors</i>                                       | <i>Estimates</i><br><i>[95%-CI]</i>      | <i>t</i>                                | <i>p</i>         |
| <b>Fixed Effects</b>                                    |                                          |                                         |                  |
| (Intercept)                                             | 6.751<br>[4.388, 9.113]                  | 5.578                                   | <0.001           |
| Status: M<Non                                           | 0.891<br>[-0.646, 2.429]                 | 1.133                                   | 0.259            |
| <b>Status: V&gt;Non</b>                                 | <b>5.773</b><br><b>[3.110, 8.435]</b>    | <b>4.235</b>                            | <b>&lt;0.001</b> |
| <b>Status: M&lt;V</b>                                   | <b>-4.881</b><br><b>[-7.634, -2.129]</b> | <b>-3.464</b>                           | <b>&lt;0.001</b> |
| Stim_Gen: m<f                                           | 0.833<br>[-0.766, 2.432]                 | 1.018                                   | 0.310            |
| Rater_Gen: m<f                                          | 0.471<br>[-2.409, 3.351]                 | 0.320                                   | 0.749            |
| S_Gen*R_Gen: m<f                                        | 0.040<br>[-1.291, 1.371]                 | 0.060                                   | 0.952            |
| <b>Random Part</b>                                      |                                          |                                         |                  |
| $\sigma^2$                                              |                                          | 436.79                                  |                  |
| $\tau_0^2$                                              |                                          | 20.33 <sub>Stim</sub>                   |                  |
| $\tau_0^2$                                              |                                          | 38.39 <sub>Sub</sub>                    |                  |
| ICC                                                     |                                          | 0.119                                   |                  |
| N                                                       |                                          | 190 <sub>Stim</sub> / 80 <sub>Sub</sub> |                  |
| Observations                                            |                                          | 15200                                   |                  |
| Conditional R <sup>2</sup> /<br>Marginal R <sup>2</sup> |                                          | 0.123 / 0.005                           |                  |

**Table S12.** LMM results predicting Sympathy-Boost through Status of the depicted person (musician, visual artist, non-artist) and the stimulus' gender (male, female) interacting with the rater's gender (male, female). To test H3a, the following model has been fitted:

$$\text{Level 1: Sympathy-Boost}_{ij} = \beta_{0j} + \beta_{10} + \beta_{1j} \text{Status}_{ij} + \beta_{2j} \text{Stim\_Gender}_{ij} * \beta_{3j} \text{Rater\_Gender}_{ij} + \varepsilon_{ij}$$

| <i>Sympathy-Boost</i>                                   |                                     |                                         |          |
|---------------------------------------------------------|-------------------------------------|-----------------------------------------|----------|
| <i>Predictors</i>                                       | <i>Estimates</i><br><i>[95%-CI]</i> | <i>t</i>                                | <i>p</i> |
| <b>Fixed Effects</b>                                    |                                     |                                         |          |
| (Intercept)                                             | 3.981<br>[2.583, 5.379]             | 5.550                                   | <0.001   |
| Status: M<Non                                           | -0.940<br>[-2.199, 0.320]           | -1.456                                  | 0.147    |
| Status: V<Non                                           | 0.226<br>[-1.956, 2.407]            | 0.202                                   | 0.840    |
| Status: M<V                                             | -1.165<br>[-3.421, 1.090]           | -1.008                                  | 0.315    |
| Stim_Gen: m<f                                           | 1.243<br>[-0.071, 2.556]            | 1.846                                   | 0.066    |
| Rater_Gen: m<f                                          | 0.480<br>[-0.985, 1.944]            | 0.642                                   | 0.522    |
| S_Gen*R_Gen: m<f                                        | -0.190<br>[-1.296, 0.915]           | -0.338                                  | 0.736    |
| <b>Random Part</b>                                      |                                     |                                         |          |
| $\sigma^2$                                              |                                     | 301.25                                  |          |
| $\tau_0^2$                                              |                                     | 13.58 <sub>Stim</sub>                   |          |
| $\tau_0^2$                                              |                                     | 7.90 <sub>Sub</sub>                     |          |
| ICC                                                     |                                     | 0.067                                   |          |
| N                                                       |                                     | 190 <sub>Stim</sub> / 80 <sub>Sub</sub> |          |
| Observations                                            |                                     | 15200                                   |          |
| Conditional R <sup>2</sup> /<br>Marginal R <sup>2</sup> |                                     | 0.068 / 0.002                           |          |

**Table S13.** LMM results predicting Trustworthiness-Boost through Status of the depicted person (musician, visual artist, non-artist) and the stimulus' gender (male, female) interacting with the rater's gender (male, female). To test H3a, the following model has been fitted:

$$\text{Level 1: Trustworthiness-Boost}_{ij} = \beta_{0j} + \beta_{i0} + \beta_{1j} \text{Status}_{ij} + \beta_{2j} \text{Stim\_Gender}_{ij} * \beta_{3j} \text{Rater\_Gender}_{ij} + \varepsilon_{ij}$$

| <i>Trustworthiness-Boost</i>                            |                                          |                                         |                  |
|---------------------------------------------------------|------------------------------------------|-----------------------------------------|------------------|
| <i>Predictors</i>                                       | <i>Estimates</i><br><i>[95%-CI]</i>      | <i>t</i>                                | <i>p</i>         |
| <b>Fixed Effects</b>                                    |                                          |                                         |                  |
| (Intercept)                                             | 5.234<br>[3.630, 6.838]                  | 6.364                                   | <0.001           |
| <b>Status: M&lt;Non</b>                                 | <b>-2.368</b><br><b>[-3.666, -1.069]</b> | <b>-3.561</b>                           | <b>&lt;0.001</b> |
| Status: V<Non                                           | -1.678<br>[-3.926, 0.570]                | -1.457                                  | 0.147            |
| Status: M<V                                             | -0.690<br>[-3.014, 1.634]                | -0.580                                  | 0.563            |
| <b>Stim_Gen: m&lt;f</b>                                 | <b>-2.112</b><br><b>[-0.756, -3.467]</b> | <b>-3.042</b>                           | <b>0.003</b>     |
| Rater_Gen: m<f                                          | -0.240<br>[-2.039, 1.558]                | -0.262                                  | 0.794            |
| S_Gen*R_Gen: m<f                                        | -0.281<br>[-1.426, 0.864]                | -0.481                                  | 0.630            |
| <b>Random Part</b>                                      |                                          |                                         |                  |
| $\sigma^2$                                              |                                          | 323.39                                  |                  |
| $\tau_0^2$                                              |                                          | 14.37 <sub>Stim</sub>                   |                  |
| $\tau_0^2$                                              |                                          | 13.32 <sub>Sub</sub>                    |                  |
| ICC                                                     |                                          | 0.079                                   |                  |
| N                                                       |                                          | 190 <sub>Stim</sub> / 80 <sub>Sub</sub> |                  |
| Observations                                            |                                          | 15200                                   |                  |
| Conditional R <sup>2</sup> /<br>Marginal R <sup>2</sup> |                                          | 0.085 / 0.006                           |                  |

**Table S14.** LMM results predicting Wish-to-Meet-Boost through Status of the depicted person (musician, visual artist, non-artist) and the stimulus' gender (male, female) interacting with the rater's gender (male, female). To test H3a, the following model has been fitted:

$$\text{Level 1: Wish-to-Meet-Boost}_{ij} = \beta_{0j} + \beta_{10} + \beta_{1j} \text{Status}_{ij} + \beta_{2j} \text{Stim\_Gender}_{ij} * \beta_{3j} \text{Rater\_Gender}_{ij} + \varepsilon_{ij}$$

| <i>Wish-to-Meet-Boost</i>                               |                                          |                                         |              |
|---------------------------------------------------------|------------------------------------------|-----------------------------------------|--------------|
| <i>Predictors</i>                                       | <i>Estimates</i><br><i>[95%-CI]</i>      | <i>t</i>                                | <i>p</i>     |
| <b>Fixed Effects</b>                                    |                                          |                                         |              |
| (Intercept)                                             | 4.755<br>[3.173, 6.338]                  | 5.862                                   | <0.001       |
| Status: M<Non                                           | -0.199<br>[-1.364, 0.965]                | -0.334                                  | 0.739        |
| <b>Status: V&gt;Non</b>                                 | <b>2.726</b><br><b>[0.709, 4.743]</b>    | <b>2.639</b>                            | <b>0.009</b> |
| <b>Status: M&lt;V</b>                                   | <b>-2.926</b><br><b>[-5.011, -0.840]</b> | <b>-2.739</b>                           | <b>0.007</b> |
| Stim_Gen: m<f                                           | 1.166<br>[-0.092, 2.424]                 | 1.810                                   | 0.071        |
| Rater_Gen: m<f                                          | -0.027<br>[-1.904, 1.850]                | -0.028                                  | 0.977        |
| S_Gen*R_Gen: m<f                                        | -0.322<br>[-1.521, 0.876]                | -0.527                                  | 0.598        |
| <b>Random Part</b>                                      |                                          |                                         |              |
| $\sigma^2$                                              |                                          | 354.31                                  |              |
| $\tau_0^2$                                              |                                          | 10.38 <sub>Stim</sub>                   |              |
| $\tau_0^2$                                              |                                          | 14.51 <sub>Sub</sub>                    |              |
| ICC                                                     |                                          | 0.066                                   |              |
| N                                                       |                                          | 190 <sub>Stim</sub> / 80 <sub>Sub</sub> |              |
| Observations                                            |                                          | 15200                                   |              |
| Conditional R <sup>2</sup> /<br>Marginal R <sup>2</sup> |                                          | 0.068 / 0.002                           |              |

**Table S15.** LMM results predicting ViewingTime-Boost through Status of the depicted person (musician, visual artist, non-artist) and the stimulus' gender (male, female) interacting with the rater's gender (male, female). To test H3a, the following model has been fitted:

$$\text{Level 1: ViewingTime-Boost}_{ij} = \beta_{0j} + \beta_{10} + \beta_{1j} \text{Status}_{ij} + \beta_{2j} \text{Stim\_Gender}_{ij} * \beta_{3j} \text{Rater\_Gender}_{ij} + \varepsilon_{ij}$$

| <i>ViewingTime-Boost</i>                                |                                          |                                         |              |
|---------------------------------------------------------|------------------------------------------|-----------------------------------------|--------------|
| <i>Predictors</i>                                       | <i>Estimates</i><br><i>[95%-CI]</i>      | <i>t</i>                                | <i>p</i>     |
| <b>Fixed Effects</b>                                    |                                          |                                         |              |
| (Intercept)                                             | 0.118<br>[0.082, 0.153]                  | 6.468                                   | <0.001       |
| <b>Status: M&lt;Non</b>                                 | <b>-0.050</b><br><b>[-0.082, -0.018]</b> | <b>-3.051</b>                           | <b>0.003</b> |
| Status: V<Non                                           | 0.035<br>[-0.021, 0.090]                 | 1.227                                   | 0.222        |
| <b>Status: M&lt;V</b>                                   | <b>-0.086</b><br><b>[-0.142, -0.027]</b> | <b>-2.890</b>                           | <b>0.004</b> |
| Stim_Gen: m<f                                           | 0.003<br>[-0.036, 0.042]                 | 0.161                                   | 0.873        |
| Rater_Gen: m<f                                          | 0.010<br>[-0.032, 0.052]                 | 0.466                                   | 0.642        |
| S_Gen*R_Gen: m<f                                        | -0.032<br>[-0.079, 0.016]                | -1.307                                  | 0.191        |
| <b>Random Part</b>                                      |                                          |                                         |              |
| $\sigma^2$                                              |                                          | 0.554                                   |              |
| $\tau_0^2$                                              |                                          | 0.004 <sub>Stim</sub>                   |              |
| $\tau_0^2$                                              |                                          | 0.003 <sub>Sub</sub>                    |              |
| ICC                                                     |                                          | 0.013                                   |              |
| N                                                       |                                          | 190 <sub>Stim</sub> / 80 <sub>Sub</sub> |              |
| Observations                                            |                                          | 15200                                   |              |
| Conditional R <sup>2</sup> /<br>Marginal R <sup>2</sup> |                                          | 0.015 / 0.002                           |              |



**Table S16.** LMM results predicting Interestingness-Boost through mean facial Interestingness, interacting with the Status of the depicted person (musician, visual artist, non-artist). To test H3b, the following model has been fitted:

$$\text{Level 1: Interestingness-Boost}_{ij} = \beta_{0j} + \beta_{10} + \beta_{1j} \text{MeanFacialInterestingness}_{ij} * \beta_{2j} \text{Status}_{ij} + \varepsilon_{ij}$$

| <i>Interestingness-Boost</i>                         |                                            |                                         |                  |
|------------------------------------------------------|--------------------------------------------|-----------------------------------------|------------------|
| <i>Predictors</i>                                    | <i>Estimates</i><br><i>[95%-CI]</i>        | <i>t</i>                                | <i>p</i>         |
| <b>Fixed Effects</b>                                 |                                            |                                         |                  |
| (Intercept)                                          | 7.321<br>[5.684, 8.958]                    | 8.752                                   | <0.001           |
| <b>MeanFacialInterest</b>                            | <b>-0.16920</b><br><b>[-0.286, -0.053]</b> | <b>0.060</b>                            | <b>0.005</b>     |
| Status: M<Non                                        | 1.380<br>[-0.099, 2.860]                   | 1.812                                   | 0.071            |
| <b>Status: V&gt;Non</b>                              | <b>7.177</b><br><b>[4.267, 10.087]</b>     | <b>4.791</b>                            | <b>&lt;0.001</b> |
| <b>Status: M&lt;V</b>                                | <b>-5.796</b><br><b>[-8.789, -2.804]</b>   | <b>-3.763</b>                           | <b>&lt;0.001</b> |
| MFI*S: M<Non                                         | -0.046<br>[-0.220, 0.128]                  | -0.517                                  | 0.605            |
| MFI*S: V<Non                                         | -0.154<br>[-0.530, 0.222]                  | -0.795                                  | 0.427            |
| MFI*S: M<V                                           | 0.108<br>[-0.273, 0.488]                   | 0.550                                   | 0.583            |
| <b>Random Part</b>                                   |                                            |                                         |                  |
| $\sigma^2$                                           |                                            | 436.76                                  |                  |
| $\tau_0^2$                                           |                                            | 18.05 <sub>Stim</sub>                   |                  |
| $\tau_0^2$                                           |                                            | 37.93 <sub>Sub</sub>                    |                  |
| ICC                                                  |                                            | 0.114                                   |                  |
| N                                                    |                                            | 190 <sub>Stim</sub> / 80 <sub>Sub</sub> |                  |
| Observations                                         |                                            | 15200                                   |                  |
| Conditional R <sup>2</sup> / Marginal R <sup>2</sup> |                                            | 0.123 / 0.010                           |                  |

**Table S17.** LMM results predicting Sympathy-Boost through mean facial Sympathy, interacting with the Status of the depicted person (musician, visual artist, non-artist). To test H3b, the following model has been fitted:

$$\text{Level 1: Sympathy-Boost}_{ij} = \beta_{0j} + \beta_{10} + \beta_{1j} \text{MeanFacialSympathy}_{ij} * \beta_{2j} \text{Status}_{ij} + \varepsilon_{ij}$$

| <i>Sympathy-Boost</i>                                |                                     |                                         |          |
|------------------------------------------------------|-------------------------------------|-----------------------------------------|----------|
| <i>Predictors</i>                                    | <i>Estimates</i><br><i>[95%-CI]</i> | <i>t</i>                                | <i>p</i> |
| <b>Fixed Effects</b>                                 |                                     |                                         |          |
| (Intercept)                                          | 4.994<br>[3.876, 6.113]             | 8.689                                   | <0.001   |
| MeanFacialSympathy                                   | -0.026<br>[-0.101, 0.049]           | -0.669                                  | 0.504    |
| Status: M<Non                                        | -0.348<br>[-1.864, 1.169]           | -0.445                                  | 0.657    |
| Status: V<Non                                        | 0.805<br>[-2.178, 3.789]            | 0.524                                   | 0.601    |
| Status: M<V                                          | -1.153<br>[-4.226, 1.921]           | -0.728                                  | 0.468    |
| MFS*S: M<Non                                         | -0.096<br>[-0.228, 0.036]           | -1.412                                  | 0.160    |
| MFS*S: V<Non                                         | -0.064<br>[-0.306, 0.179]           | -0.508                                  | 0.612    |
| MFS*S: M<V                                           | -0.032<br>[-0.288, 0.223]           | -0.247                                  | 0.805    |
| <b>Random Part</b>                                   |                                     |                                         |          |
| $\sigma^2$                                           |                                     | 301.236                                 |          |
| $\tau_0^2$                                           |                                     | 13.562 <sub>Stim</sub>                  |          |
| $\tau_0^2$                                           |                                     | 7.817 <sub>Sub</sub>                    |          |
| ICC                                                  |                                     | 0.066                                   |          |
| N                                                    |                                     | 190 <sub>Stim</sub> / 80 <sub>Sub</sub> |          |
| Observations                                         |                                     | 15200                                   |          |
| Conditional R <sup>2</sup> / Marginal R <sup>2</sup> |                                     | 0.068 / 0.002                           |          |

**Table S18.** LMM results predicting Trustworthiness-Boost through mean facial Trustworthiness, interacting with the Status of the depicted person (musician, visual artist, non-artist). To test H3b, the following model has been fitted:

$$\text{Level 1: Trustworthiness-Boost}_{ij} = \beta_{0j} + \beta_{i0} + \beta_{1j} \text{MeanFacialTrustworthiness}_{ij} * \beta_{2j} \text{Status}_{ij} + \varepsilon_{ij}$$

| <i>Trustworthiness-Boost</i>                         |                                          |                                         |              |
|------------------------------------------------------|------------------------------------------|-----------------------------------------|--------------|
| <i>Predictors</i>                                    | <i>Estimates</i><br><i>[95%-CI]</i>      | <i>t</i>                                | <i>p</i>     |
| <b>Fixed Effects</b>                                 |                                          |                                         |              |
| (Intercept)                                          | 7.12823<br>[5.832, 8.424]                | 10.708                                  | <0.001       |
| <b>MeanFacialTrust</b>                               | <b>-0.152</b><br><b>[-0.249, -0.056]</b> | <b>-3.070</b>                           | <b>0.002</b> |
| <b>Status: M&lt;Non</b>                              | <b>-2.342</b><br><b>[-3.973, -0.711]</b> | <b>-2.788</b>                           | <b>0.006</b> |
| Status: V<Non                                        | -0.945<br>[-4.434, 2.543]                | -0.526                                  | 0.599        |
| Status: M<V                                          | -1.39631<br>[-4.964, 2.171]              | -0.760                                  | 0.448        |
| MFT*S: M<Non                                         | -0.025<br>[-0.190, 0.140]                | -0.290                                  | 0.772        |
| MFT*S: V<Non                                         | -0.045<br>[-0.353, 0.263]                | -0.283                                  | 0.777        |
| MFT*S: M<V                                           | 0.020<br>[-0.302, 0.342]                 | 0.122                                   | 0.903        |
| <b>Random Part</b>                                   |                                          |                                         |              |
| $\sigma^2$                                           |                                          | 323.38                                  |              |
| $\tau_0^2$                                           |                                          | 13.84 <sub>Stim</sub>                   |              |
| $\tau_0^2$                                           |                                          | 13.17 <sub>Sub</sub>                    |              |
| ICC                                                  |                                          | 0.077                                   |              |
| N                                                    |                                          | 190 <sub>Stim</sub> / 80 <sub>Sub</sub> |              |
| Observations                                         |                                          | 15200                                   |              |
| Conditional R <sup>2</sup> / Marginal R <sup>2</sup> |                                          | 0.085 / 0.008                           |              |

**Table S19.** LMM results predicting Wish-to-Meet-Boost through mean facial value for Wish-to-Meet, interacting with the Status of the depicted person (musician, visual artist, non-artist). To test H3b, the following model has been fitted:

$$\text{Level 1: Wish-to-Meet-Boost}_{ij} = \beta_{0j} + \beta_{10} + \beta_{1j} \text{MeanFacialWish-to-Meet}_{ij} * \beta_{2j} \text{Status}_{ij} + \varepsilon_{ij}$$

| <i>Wish-to-Meet-Boost</i>                            |                                          |                                         |                  |
|------------------------------------------------------|------------------------------------------|-----------------------------------------|------------------|
| <i>Predictors</i>                                    | <i>Estimates</i><br><i>[95%-CI]</i>      | <i>t</i>                                | <i>p</i>         |
| <b>Fixed Effects</b>                                 |                                          |                                         |                  |
| (Intercept)                                          | 5.06844<br>[3.962, 6.175]                | 8.945                                   | <0.001           |
| MeanFacialMeet                                       | -0.085<br>[-0.169, -0.001]               | -1.967                                  | 0.051            |
| Status: M<Non                                        | -0.293<br>[-1.446, 0.860]                | -0.493                                  | 0.622            |
| <b>Status: V&gt;Non</b>                              | <b>3.357</b><br><b>[1.314, 5.401]</b>    | <b>3.191</b>                            | <b>0.002</b>     |
| <b>Status: M&lt;V</b>                                | <b>-3.650</b><br><b>[-5.756, -1.545]</b> | <b>-3.368</b>                           | <b>&lt;0.001</b> |
| MFM*S: M<Non                                         | -0.084<br>[-0.217, 0.050]                | -1.216                                  | 0.226            |
| MFM*S: V<Non                                         | -0.119<br>[-0.390, 0.152]                | -0.854                                  | 0.394            |
| MFM*S: M<V                                           | 0.036<br>[-0.242, 0.313]                 | 0.249                                   | 0.804            |
| <b>Random Part</b>                                   |                                          |                                         |                  |
| $\sigma^2$                                           |                                          | 354.291                                 |                  |
| $\tau_0^2$                                           |                                          | 9.572 <sub>Stim</sub>                   |                  |
| $\tau_0^2$                                           |                                          | 14.309 <sub>Sub</sub>                   |                  |
| ICC                                                  |                                          | 0.063                                   |                  |
| N                                                    |                                          | 190 <sub>Stim</sub> / 80 <sub>Sub</sub> |                  |
| Observations                                         |                                          | 15200                                   |                  |
| Conditional R <sup>2</sup> / Marginal R <sup>2</sup> |                                          | 0.068 / 0.005                           |                  |

**Table S20.** LMM results predicting ViewingTime-Boost through mean facial ViewingTime, interacting with the Status of the depicted person (musician, visual artist, non-artist). To test H3b, the following model has been fitted:

$$\text{Level 1: ViewingTime-Boost}_{ij} = \beta_{0j} + \beta_{10} + \beta_{1j} \text{MeanFacialViewingTime}_{ij} * \beta_{2j} \text{Status}_{ij} + \varepsilon_{ij}$$

| <i>ViewingTime-Boost</i>                             |                                          |                                         |                  |
|------------------------------------------------------|------------------------------------------|-----------------------------------------|------------------|
| <i>Predictors</i>                                    | <i>Estimates</i><br><i>[95%-CI]</i>      | <i>t</i>                                | <i>p</i>         |
| <b>Fixed Effects</b>                                 |                                          |                                         |                  |
| (Intercept)                                          | 6.888<br>[4.535, 9.241]                  | 5.682                                   | <0.001           |
| <b>MeanFacialView</b>                                | <b>-0.687</b><br><b>[-0.925, -0.448]</b> | <b>-5.586</b>                           | <b>&lt;0.001</b> |
| Status: M<Non                                        | -1.029<br>[-5.058, 2.999]                | -0.496                                  | 0.621            |
| Status: V<Non                                        | 2.399<br>[-7.242, 12.040]                | 0.483                                   | 0.630            |
| Status: M<V                                          | -3.429<br>[-13.333, 6.476]               | -0.672                                  | 0.503            |
| MFV*S: M<Non                                         | 0.100<br>[-0.308, 0.508]                 | 0.476                                   | 0.635            |
| MFV*S: V<Non                                         | -0.240<br>[-1.217, 0.738]                | -0.476                                  | 0.635            |
| MFV*S: M<V                                           | 0.340<br>[-0.664, 1.344]                 | 0.656                                   | 0.512            |
| <b>Random Part</b>                                   |                                          |                                         |                  |
| $\sigma^2$                                           |                                          | 0.554                                   |                  |
| $\tau_0^2$                                           |                                          | 0.002 <sub>Stim</sub>                   |                  |
| $\tau_0^2$                                           |                                          | 0.003 <sub>Sub</sub>                    |                  |
| ICC                                                  |                                          | 0.009                                   |                  |
| N                                                    |                                          | 190 <sub>Stim</sub> / 80 <sub>Sub</sub> |                  |
| Observations                                         |                                          | 15200                                   |                  |
| Conditional R <sup>2</sup> / Marginal R <sup>2</sup> |                                          | 0.014 / 0.005                           |                  |

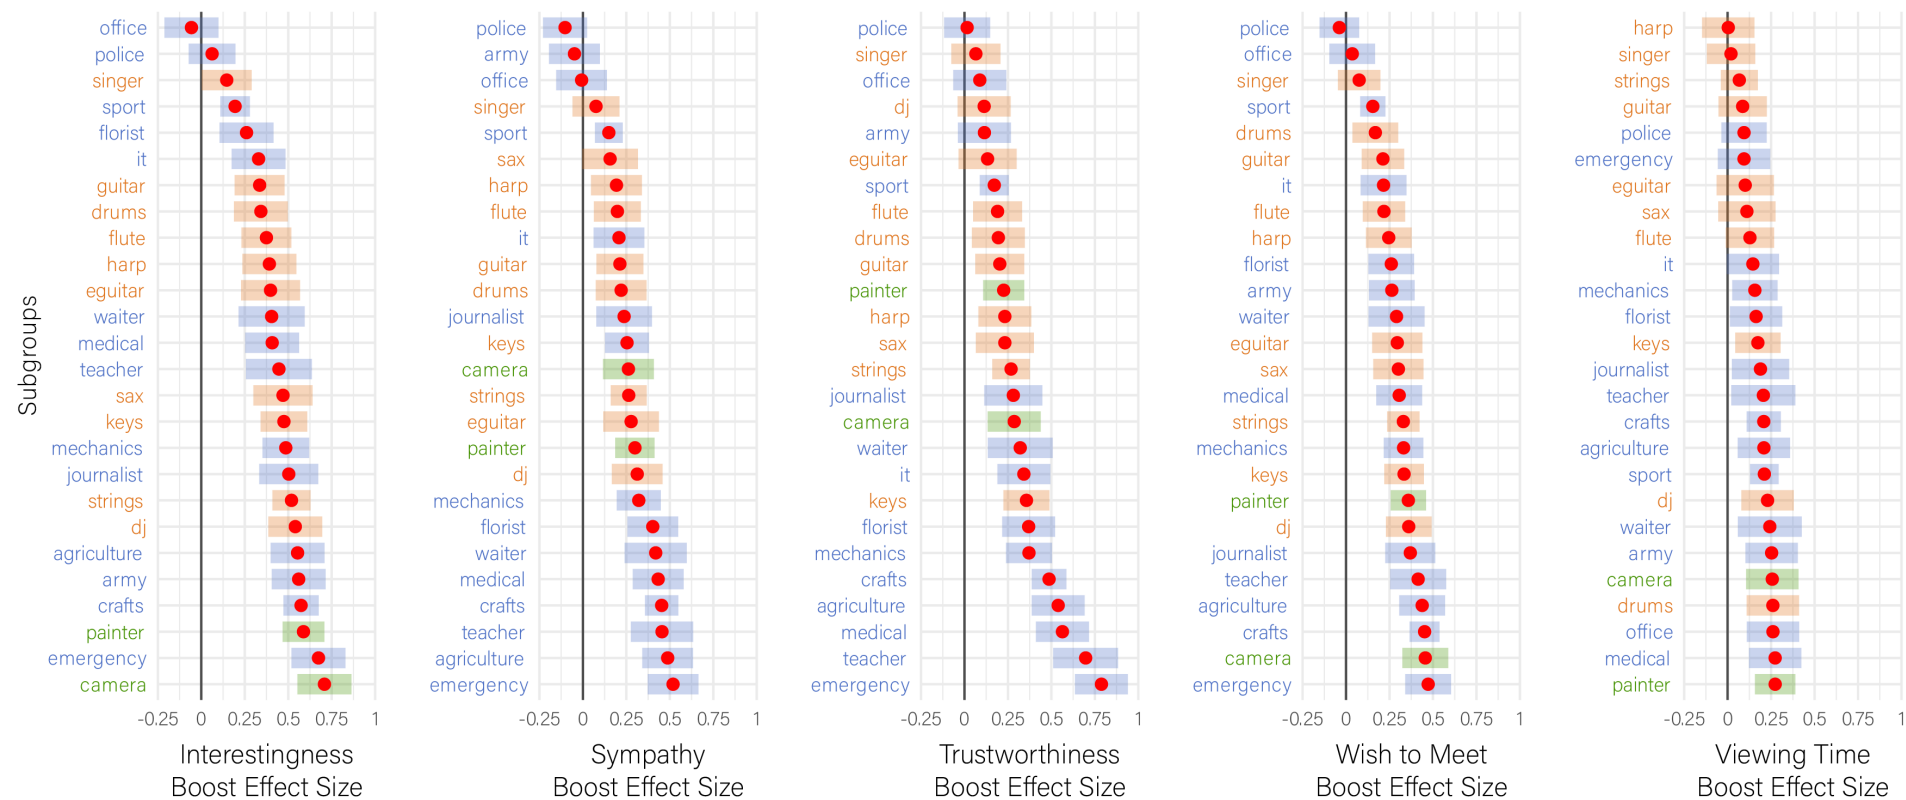

**Figure S8.** Effect sizes of boosts per subgroup for all remaining variables beside Attractiveness (which is shown in Fig. 6). The forest plots depict EMMs for the boosts expressed as Cohen's d for each stimulus and predicted in a linear model by subgroup membership. The error bars represent 95 % confidence limits. For better readability, the superordinate status membership of the subgroups is coded in color: non-artists are shown in blue, musicians in orange and visual artists in green.

**Table S21.** LMM results for the comprehensive covariates model (model.9 in R script) predicting Attractiveness through Layout and Status, while controlling for stimulus order, character's smile intensity, character's gaze direction, character's estimated income, character's estimated age, character's gender, rater's gender, rater's preference for professions and their own music production (today and overall, including their past).

| <i>Predictors</i>          | <i>Attractiveness</i>               |                |                  |
|----------------------------|-------------------------------------|----------------|------------------|
|                            | <i>Estimates</i><br><i>[95%-CI]</i> | <i>t</i>       | <i>p</i>         |
| <b>Fixed Effects</b>       |                                     |                |                  |
| (Intercept)                | 17.239 [9.957, 24.518]              | 4.563          | <0.001           |
| <b>Layout</b>              | <b>3.332 [2.872, 3.792]</b>         | <b>14.201</b>  | <b>&lt;0.001</b> |
| Status: M<Non              | -1.244 [-4.541, 2.052]              | -0.730         | 0.466            |
| Status: V<Non              | -0.028 [-5.307, 5.249]              | -0.010         | 0.991            |
| Status: M<V                | -1.266 [-3.117, 0.585]              | -1.327         | 0.185            |
| <b>Stimulus_Order</b>      | <b>-0.019 [-0.022, -0.016]</b>      | <b>-12.054</b> | <b>&lt;0.001</b> |
| Income                     | -0.000 [-0.001, 0.000]              | -0.642         | 0.521            |
| <b>Prof_Pref</b>           | <b>0.056 [0.047, 0.065]</b>         | <b>12.532</b>  | <b>&lt;0.001</b> |
| Smile                      | 1.037 [-0.111, 2.186]               | 1.745          | 0.082            |
| <b>Gaze</b>                | <b>-3.107 [-6.144, -0.070]</b>      | <b>-1.976</b>  | <b>0.049</b>     |
| <b>Age</b>                 | <b>-0.402 [-0.581, -0.221]</b>      | <b>-4.317</b>  | <b>&lt;0.001</b> |
| <b>Stim_Gender: M&lt;F</b> | <b>-10.198 [-12.799, -7.598]</b>    | <b>-7.575</b>  | <b>&lt;0.001</b> |
| Gender: M<F                | -3.465 [-0.396, 7.327]              | -1.738         | 0.086            |
| <b>L*S: M&lt;Non</b>       | <b>-1.256 [-1.986, -0.526]</b>      | <b>-3.372</b>  | <b>&lt;0.001</b> |
| L*S: V<Non                 | 0.131 [-1.133, 1.395]               | 0.203          | 0.838            |
| L*S: M<V                   | 0.003 [-0.7, 0.706]                 | 0.011          | 0.991            |
| Status N : Leisure         | 1.373 [-0.737, 3.484]               | 1.261          | 0.211            |
| Status M : Leisure         | 0.834 [-1.284, 2.953]               | 0.763          | 0.447            |
| Status V : Leisure         | 0.859 [-1.331, 3.050]               | 0.760          | 0.449            |
| Status N : Instrument      | -0.546 [-1.969, 0.876]              | -0.745         | 0.458            |
| Status M : Instrument      | -0.338 [-1.766, 1.089]              | -0.459         | 0.647            |
| Status V : Instrument      | -0.114 [-1.591, 1.363]              | -0.150         | 0.881            |

**Table 21 [continued]**

| <b>Random Part</b>                                   |                                         |
|------------------------------------------------------|-----------------------------------------|
| $\sigma^2$                                           | 231.24                                  |
| $\tau_0^2$                                           | 80.24 <sub>Stim</sub>                   |
| $\tau_0^2$                                           | 77.39 <sub>Sub</sub>                    |
| ICC                                                  | 0.405                                   |
| N                                                    | 190 <sub>Stim</sub> / 80 <sub>Sub</sub> |
| Observations                                         | 30400                                   |
| Conditional R <sup>2</sup> / Marginal R <sup>2</sup> | 0.480 / 0.125                           |



**Table S22.** Model comparison. The initial model (model.0) predicts the Attractiveness by the factors Layout and Status. It is Model-A as described in the manuscript. The consecutive models (model.1 to 9) append cumulatively one of the following covariates: stimulus order, estimated income of the depicted character, rater's preference for professions (Prof\_Pref), character's smile intensity, character's gaze direction, character's estimated age, character's gender, rater's gender, rater's own musicality. The statistical model fit to the data is tested via the *anova* function in R.

| <i>Statistical Model Fit</i> |                        |                        |               |               |                    |                  |
|------------------------------|------------------------|------------------------|---------------|---------------|--------------------|------------------|
| <i>Model</i>                 | <i>n of parameters</i> | <i>added covariate</i> | <i>AIC</i>    | <i>BIC</i>    | <i>Chi squared</i> | <i>p</i>         |
| model.0                      | 9                      | [Layout * Status]      | 253297        | 253372        |                    |                  |
| model.1                      | 10                     | Stim_Order             | <b>253152</b> | <b>253235</b> | <b>147.081</b>     | <b>&lt;0.001</b> |
| <b>model.2</b>               | <b>11</b>              | <b>Income</b>          | <b>253149</b> | <b>253241</b> | <b>5.022</b>       | <b>0.025</b>     |
| <b>model.3</b>               | <b>12</b>              | <b>Prof_Pref</b>       | <b>253000</b> | <b>253100</b> | <b>151.225</b>     | <b>&lt;0.001</b> |
| <b>model.4</b>               | <b>13</b>              | <b>Smile</b>           | <b>252998</b> | <b>253106</b> | <b>4.188</b>       | <b>0.040</b>     |
| model.5                      | 14                     | Gaze                   | 252997        | 253114        | 2.589              | 0.107            |
| <b>model.6</b>               | <b>15</b>              | <b>Age</b>             | <b>252979</b> | <b>253103</b> | <b>20.467</b>      | <b>&lt;0.001</b> |
| <b>model.7</b>               | <b>16</b>              | <b>Sim_Gender</b>      | <b>252929</b> | <b>253062</b> | <b>51.871</b>      | <b>&lt;0.001</b> |
| model.8                      | 17                     | Rater_Gender           | 252928        | 253069        | 2.792              | 0.094            |
| model.9                      | 23                     | Rater_Musicality       | 252930        | 253121        | 10.283             | 0.113            |

\* AIC: Akaike information criterion, BIC: Bayesian information criterion
